# Supplementary material for: Long-Wavelength Steric Sea Level and Heat Storage Anomaly Maps by Combining Argo Temperature and Salinity Profiles with Satellite Altimetry and Gravimetry
Source: Copernicus journal article supplement (doi:10.5194/essd-2025-510), 2025-09-09
Supplement: Supplementary file 1 [file essd-2025-510-supplement.pdf]

Supplemental Material for “Long-Wavelength Steric Sea Level and Heat Storage Anomaly Maps by Combining Argo Temperature and Salinity Profiles with Satellite Altimetry and Gravimetry”

Don P. Chambers<sup>1</sup> and Sara Reinelt<sup>1</sup>

<sup>1</sup> College of Marine Science, University of South Florida, St. Petersburg, FL, USA

Correspondence to: Don P. Chambers (donc@usf.edu)

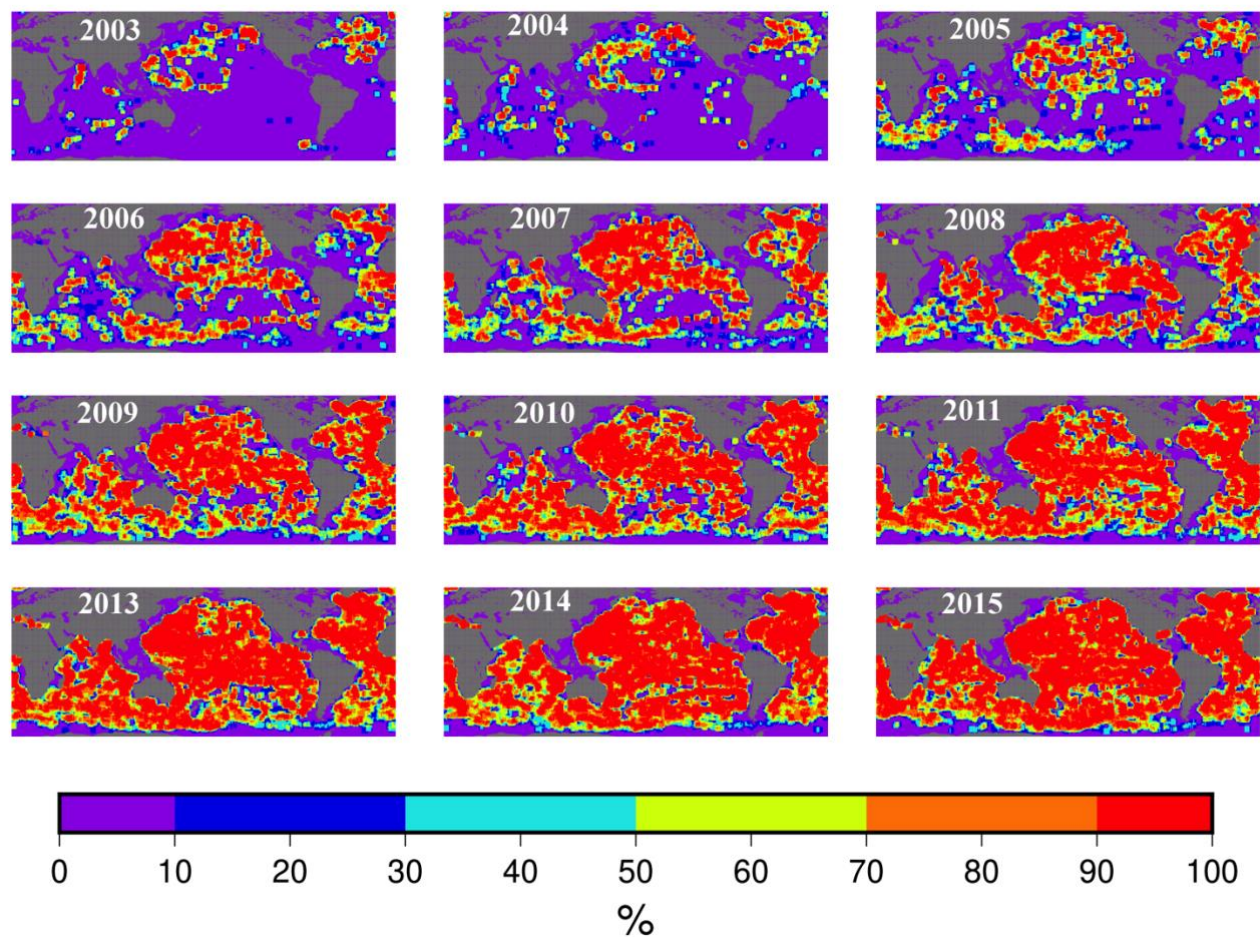

10 **Figure S1: Percentage of months during each year (2003-2014) when there is at least 1 Argo profile within 500 km of the center of each 1°x1° grid.**

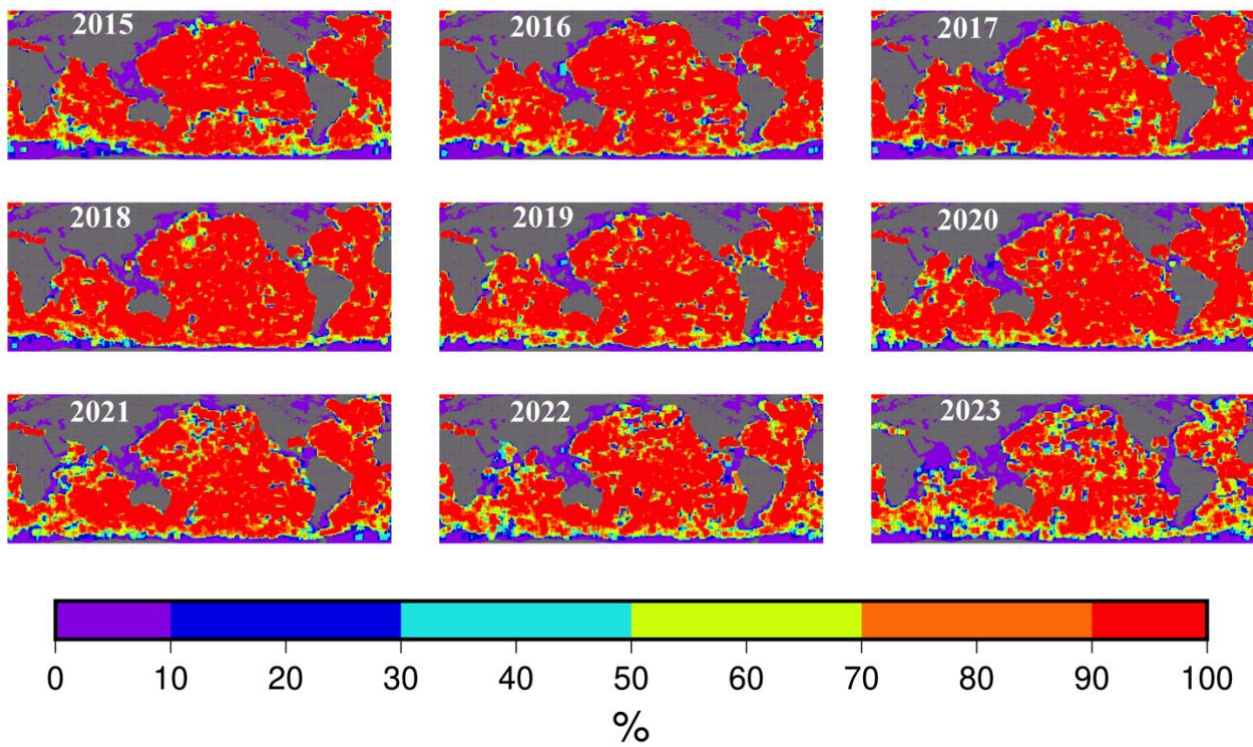

Figure S2: Same as Fig. S1 but for 2015-2023.
